# Supplementary material
Source: PubMed Central journal article supplement (PMC5884124)
Supplement: NIHMS921744-supplement-1.pdf [file NIHMS921744-supplement-1.pdf]

## Supplementary Tables

**Table S1 – Summary statistics of pigmentation phenotypes for global population.**

**(Related to Figure 1)** All statistics relate to M index for baseline pigmentation. Rows with no dataset listed refer to subsets of the dataset in prior rows, e.g. >90% KhoeSan Nama refers to the Nama samples from this study. Cape Verdean samples from (Beleza et al., 2013) were broken into quantiles, labeled Q1 to Q4.  $\mu$  = mean,  $\sigma$  = standard deviation, and  $c_v$  = coefficient of variation ( $\sigma/\mu$ ), a standardized metric of dispersion.

| Dataset         | Population           | Latitude | N   | $\mu$ | $\sigma$ | $c_v$ |
|-----------------|----------------------|----------|-----|-------|----------|-------|
| Candille        | Ireland              | 53.35    | 42  | 27.10 | 1.95     | 0.07  |
| Candille        | Poland               | 52.23    | 45  | 30.54 | 1.86     | 0.06  |
| Parra           | European             | 48.14    | 135 | 28.32 | 2.72     | 0.10  |
| Candille        | Italy                | 41.90    | 45  | 31.35 | 2.06     | 0.07  |
| Candille        | Portugal             | 41.16    | 43  | 30.73 | 2.46     | 0.08  |
| Parra           | East Asian           | 35.86    | 116 | 31.07 | 2.98     | 0.10  |
| Coussens        | Xhosa                | 34.03    | 50  | 67.10 | 7.50     | 0.11  |
| Coussens        | Cape Mixed           | 33.91    | 42  | 53.10 | 8.50     | 0.16  |
| Basu Mallick    | Ror                  | 29.69    | 44  | 42.16 | 4.11     | 0.10  |
| This study      | Nama                 | 28.82    | 223 | 52.12 | 8.93     | 0.17  |
|                 | >90% KhoeSan Nama    | 28.82    | 15  | 51.70 | 5.74     | 0.11  |
| This study      | Khomani              | 28.40    | 278 | 57.57 | 10.12    | 0.18  |
|                 | >90% KhoeSan Khomani | 28.40    | 41  | 56.10 | 6.93     | 0.12  |
| Sandoval/Moreno | Easter Island        | 27.13    | 81  | 44.27 | 5.57     | 0.13  |
| Parra           | South Asian          | 21.13    | 117 | 37.48 | 5.48     | 0.15  |
| Basu Mallick    | Nihali               | 20.94    | 33  | 58.01 | 6.66     | 0.11  |
| Basu Mallick    | Korku                | 20.94    | 35  | 52.46 | 7.92     | 0.15  |
| Basu Mallick    | Kapu                 | 17.39    | 272 | 43.41 | 4.87     | 0.11  |
| Basu Mallick    | Naidu                | 17.39    | 112 | 43.57 | 4.87     | 0.11  |
| Basu Mallick    | Reddy                | 17.05    | 844 | 43.72 | 4.87     | 0.11  |
| Sandoval/Moreno | Peruvians            | 15.85    | 117 | 51.88 | 4.58     | 0.09  |
| Beleza          | Cape Verde           | 15.11    | 684 | 55.39 | 13.00    | 0.23  |
|                 | Q1 African ancestry  | 15.11    | 171 | 46.23 | 7.73     | 0.17  |
|                 | Q2 African ancestry  | 15.11    | 171 | 51.98 | 9.48     | 0.18  |
|                 | Q3 African ancestry  | 15.11    | 171 | 54.31 | 9.83     | 0.18  |
|                 | Q4 African ancestry  | 15.11    | 171 | 69.09 | 12.10    | 0.18  |
| Basu Mallick    | Toda                 | 11.41    | 11  | 42.96 | 4.12     | 0.10  |
| Basu Mallick    | Kurumba              | 11.41    | 24  | 56.41 | 5.29     | 0.09  |
| Basu Mallick    | Badaga               | 11.41    | 31  | 46.18 | 6.15     | 0.13  |
| Basu Mallick    | Kota                 | 11.41    | 27  | 45.13 | 6.30     | 0.14  |
| Basu Mallick    | Saurashtrian         | 9.92     | 25  | 42.36 | 4.90     | 0.12  |
| Basu Mallick    | Brahmin              | 9.92     | 20  | 41.07 | 5.51     | 0.13  |
| Basu Mallick    | Yadava               | 9.92     | 27  | 58.21 | 8.03     | 0.14  |
| Durazo-Arvizu   | Ghana                | 6.67     | 237 | 96.04 | 10.94    | 0.11  |
| Norton          | Bougainville         | 6.05     | 153 | 89.84 | 9.52     | 0.11  |
| Norton          | Papua New Guinae     | 5.90     | 21  | 67.94 | 9.42     | 0.14  |
| Norton          | New Britain          | 5.56     | 491 | 67.92 | 6.80     | 0.10  |
| Norton          | New Ireland          | 3.32     | 242 | 74.22 | 8.06     | 0.11  |

|        |          |      |     |       |      |      |
|--------|----------|------|-----|-------|------|------|
| Norton | Lavongai | 2.52 | 102 | 77.12 | 7.51 | 0.10 |
| Norton | Mussau   | 1.41 | 35  | 65.48 | 7.95 | 0.12 |

**Table S2 – Reference and KhoeSan samples included in the ADMIXTURE analysis. (Related to Figure 2)**

| Population    | Country      | Region          | N   | Reference     |
|---------------|--------------|-----------------|-----|---------------|
| Khomani       | South Africa | Southern Africa | 121 | Present study |
| Nama          | South Africa | Southern Africa | 112 | Present study |
| NamibSan      | Namibia      | Southern Africa | 6   | HGDP          |
| Hadza         | Tanzania     | Southern Africa | 17  | Henn 2011     |
| Sandawe       | Tanzania     | Southern Africa | 28  | Henn 2011     |
| Maasai        | Kenya        | Eastern Africa  | 30  | HapMap        |
| Bantu (Kenya) | Kenya        | Eastern Africa  | 11  | HGDP          |
| Bantu (SA)    | South Africa | Southern Africa | 8   | HGDP          |
| Yoruba        | Nigeria      | Western Africa  | 55  | HapMap        |
| Mozabite      | Algeria      | Northern Africa | 29  | HGDP          |
| CEU           | USA          | North America   | 86  | HapMap        |
| French        | France       | Europe          | 28  | HGDP          |

**Table S3 – Heritability estimates by population using multiple approaches. (Related to Table 1)** Heritability was assessed separately and jointly in the ‡Khomani and Nama populations. Because of population structure, haplotypes were called separately, (i.e. even when populations were analyzed jointly). N = number of individuals. SNPs = number of SNPs included.

| Population   | Phenotype    | Dataset         | N   | SNPs   | Covariates  | h <sup>2</sup> | s.e   |
|--------------|--------------|-----------------|-----|--------|-------------|----------------|-------|
| ‡Khomani San | Pigmentation | GCTA GRM        | 107 | 300370 | Euro, Bantu | 0.897          | 0.205 |
|              |              | REAP            | 107 | 300370 | Euro, Bantu | 0.963          | 0.219 |
|              |              | Exome GRM       | 82  | 117132 | Euro, Bantu | 0.954          | 0.256 |
|              |              | SOLAR, pedigree | 250 | NA     | Euro, Bantu | 0.934          | 0.165 |
|              |              | KIBD            | 107 | NA     | Euro, Bantu | 0.957          | 0.244 |
|              | Tanning      | GCTA GRM        | 107 | 300370 | Age, Sex    | 0.405          | 0.278 |
|              |              | REAP            | 107 | 300370 | Age, Sex    | 0.470          | 0.305 |
|              |              | Exome GRM       | 82  | 117132 | Age, Sex    | 0.373          | 0.368 |
|              |              | SOLAR, pedigree | 276 | NA     | Age, Sex    | 0.214          | 0.137 |
|              |              | KIBD            | 107 | NA     | Age, Sex    | 0.415          | 0.335 |
| Nama         | Pigmentation | GCTA GRM        | 109 | 526471 | Euro, Bantu | 0.953          | 0.207 |
|              |              | REAP            | 109 | 526471 | Euro, Bantu | 0.981          | 0.219 |
|              |              | SOLAR, pedigree | 168 | NA     | Euro, Bantu | 0.872          | 0.223 |
|              |              | KIBD            | 109 | NA     | Euro, Bantu | 0.987          | 0.247 |
|              | Tanning      | GCTA GRM        | 109 | 526471 | Age, Sex    | 0.405          | 0.278 |
|              |              | REAP            | 109 | 526471 | Age, Sex    | 0.47           | 0.305 |
|              |              | SOLAR, pedigree | 200 | NA     | Age, Sex    | 0.128          | 0.372 |
|              |              | KIBD            | 109 | NA     | Age, Sex    | 0.509          | 0.337 |

|                 |              |                 |     |        |             |       |       |
|-----------------|--------------|-----------------|-----|--------|-------------|-------|-------|
| ‡Khomani & Nama | Pigmentation | GCTA GRM        | 216 | 241929 | Euro, Bantu | 0.900 | 0.150 |
|                 |              | REAP            | 216 | 217077 | Euro, Bantu | 0.975 | 0.152 |
|                 |              | SOLAR, pedigree | 419 | NA     | Euro, Bantu | 0.959 | 0.125 |
|                 |              | KIBD            | 216 | NA     | Euro, Bantu | 0.972 | 0.157 |
|                 | Tanning      | GCTA GRM        | 216 | 241929 | Age, Sex    | 0.314 | 0.195 |
|                 |              | REAP            | 216 | 217077 | Age, Sex    | 0.411 | 0.211 |
|                 |              | SOLAR, pedigree | 477 | NA     | Age, Sex    | 0.192 | 0.116 |
|                 |              | KIBD            | 216 | NA     | Age, Sex    | 0.449 | 0.216 |

**Table S4 – Number of individuals from each population that were phenotyped, genotyped, exome sequenced, or with targeted resequencing data.** Pheno = phenotyped, Geno=genotyped, Exome = exome sequenced, Reseq = targeted resequencing. We also indicate the overlap among different genotyping arrays, which are as follows: 550k = Illumina 550k array, OmniEx = Illumina OmniExpress array, OmniExPlus = Illumina OmniExpressPlus array, Omni2.5 = Illumina Omni2.5 array, Mega = Illumina Multi-ethnic genotyping array. Phase 2 of the GWAS analysis consisted of samples genotyped on the MEGA array.

| Population |            | Pheno | Geno | Exome | Reseq | 550k | OmniEx | OmniExPlus | Omni2.5 | Mega |
|------------|------------|-------|------|-------|-------|------|--------|------------|---------|------|
| Combined   | Pheno      | 479   | 446  | 84    | 421   | 21   | 68     | 31         | 97      | 301  |
|            | Geno       | 446   | 465  | 88    | 413   | 35   | 68     | 31         | 100     | 305  |
|            | Exome      | 84    | 88   | 91    |       | 23   | 58     | 5          | 0       | 34   |
|            | Reseq      | 421   | 413  | 81    | 439   | 25   | 66     | 30         | 87      | 275  |
|            | 550k       | 21    | 35   | 23    | 25    | 35   | 0      | 0          | 2       | 10   |
|            | OmniEx     | 68    | 68   | 58    | 66    | 0    | 68     | 0          | 0       | 25   |
|            | OmniExPlus | 31    | 31   | 5     | 30    | 0    | 0      | 31         | 1       | 11   |
|            | Omni2.5    | 97    | 100  | 0     | 87    | 2    | 0      | 1          | 100     | 25   |
|            | Mega       | 301   | 305  | 34    | 275   | 10   | 25     | 11         | 25      | 305  |
| ‡Khomani   | Pheno      | 277   | 261  | 84    | 251   | 21   | 68     | 18         | 0       | 195  |
|            | Geno       | 261   | 278  | 88    | 248   | 35   | 68     | 18         | 2       | 198  |
|            | Exome      | 84    | 88   | 91    | 81    | 23   | 58     | 5          | 0       | 34   |
|            | Reseq      | 251   | 248  | 81    | 268   | 25   | 66     | 18         | 0       | 180  |
|            | 550k       | 21    | 35   | 23    | 25    | 35   | 0      | 0          | 2       | 10   |
|            | OmniEx     | 68    | 68   | 58    | 66    | 0    | 68     | 0          | 0       | 25   |
|            | OmniExPlus | 18    | 18   | 5     | 18    | 0    | 0      | 18         | 0       | 6    |
|            | Omni2.5    | 0     | 2    | 0     | 0     | 2    | 0      | 0          | 2       | 0    |
|            | Mega       | 195   | 198  | 34    | 180   | 10   | 25     | 6          | 0       | 198  |
| Nama       | Pheno      | 202   | 185  | 0     | 170   | 0    | 0      | 13         | 97      | 106  |
|            | Geno       | 185   | 187  | 0     | 165   | 0    | 0      | 13         | 98      | 107  |
|            | Exome      | 0     | 0    | 0     | 0     | 0    | 0      | 0          | 0       | 0    |
|            | Reseq      | 170   | 165  | 0     | 171   | 0    | 0      | 12         | 87      | 95   |
|            | 550k       | 0     | 0    | 0     | 0     | 0    | 0      | 0          | 0       | 0    |
|            | OmniEx     | 0     | 0    | 0     | 0     | 0    | 0      | 0          | 0       | 0    |
|            | OmniExPlus | 13    | 13   | 0     | 12    | 0    | 0      | 13         | 1       | 5    |
|            | Omni2.5    | 97    | 98   | 0     | 87    | 0    | 0      | 1          | 98      | 25   |
|            | Mega       | 106   | 107  | 0     | 95    | 0    | 0      | 5          | 25      | 107  |

**Table S5 – Top 50 associations from initial GWAS. (Related to Figure 5)** All associations shown are independent ( $R^2 \leq 0.5$ , window size = 250 kb), and indicate the association between genotype dosages and skin pigmentation M index across the Nama and ‡Khomani datasets. The # tagging column indicates the number of SNPs with an rsID that are tagged by the independent signal.

| Chr | Position  | SNP        | Closest_gene | Gene_start | Gene_end  | Distance | P value  | # tagging |
|-----|-----------|------------|--------------|------------|-----------|----------|----------|-----------|
| 5   | 111622148 | rs13170079 | EPB41L4A     | 111478137  | 111564475 | 57673    | 1.08E-06 | 0         |
| 8   | 72951490  | rs10504523 | TRPA1        | 72933485   | 72987852  | 0        | 3.12E-06 | 1         |

|    |           |             |              |           |           |        |          |    |
|----|-----------|-------------|--------------|-----------|-----------|--------|----------|----|
| 8  | 13241026  | rs6994536   | DLC1         | 12940869  | 13372395  | 0      | 4.62E-06 | 3  |
| 9  | 1702573   | rs10962731  | SMARCA2      | 2015341   | 2193624   | 312768 | 1.04E-05 | 0  |
| 4  | 89900558  | rs11945054  | TIGD2        | 90033967  | 90036050  | 133409 | 1.59E-05 | 5  |
| 8  | 529244    | rs1703884   | TDRP         | 439802    | 494998    | 34246  | 1.61E-05 | 0  |
| 16 | 73173205  | rs6499616   | HCCAT5       | 73126247  | 73127673  | 45532  | 1.99E-05 | 0  |
| 12 | 5692000   | rs10849298  | ANO2         | 5671816   | 6055398   | 0      | 2.00E-05 | 0  |
| 4  | 175923101 | rs12502984  | AC105914.1   | 175848457 | 175848542 | 74559  | 2.15E-05 | 1  |
| 6  | 110819059 | rs6922009   | SLC22A16     | 110745889 | 110797844 | 21215  | 2.39E-05 | 0  |
| 22 | 35227406  | rs147291650 | RP1-272J12.1 | 35318598  | 35468259  | 91192  | 2.95E-05 | 3  |
| 5  | 160722863 | rs252965    | GABRB2       | 160715435 | 160973649 | 0      | 3.15E-05 | 0  |
| 11 | 132402910 | rs7125438   | OPCML        | 132284870 | 132813566 | 0      | 3.43E-05 | 0  |
| 3  | 115151361 | rs139280087 | GAP43        | 115342170 | 115440337 | 190809 | 3.59E-05 | 0  |
| 5  | 110506404 | rs76678422  | WDR36        | 110427413 | 110466200 | 40204  | 3.79E-05 | 2  |
| 9  | 2496567   | rs872257    | VLDLR        | 2621833   | 2660053   | 125266 | 4.72E-05 | 0  |
| 18 | 25216159  | rs11873957  | CDH2         | 25530929  | 25757410  | 314770 | 4.85E-05 | 0  |
| 12 | 13248157  | rs17820032  | GSG1         | 13236493  | 13248609  | 0      | 4.97E-05 | 0  |
| 14 | 70466081  | rs17107583  | SLC8A3       | 70510933  | 70655787  | 44852  | 5.28E-05 | 0  |
| 16 | 73185078  | rs7190071   | HCCAT5       | 73126247  | 73127673  | 57405  | 5.52E-05 | 0  |
| 15 | 48595192  | rs8025278   | SLC12A1      | 48498497  | 48596273  | 0      | 5.66E-05 | 10 |
| 5  | 118962245 | rs1574641   | FAM170A      | 118965291 | 118970777 | 3046   | 5.82E-05 | 13 |
| 14 | 64603204  | rs11158532  | SYNE2        | 64319682  | 64693165  | 0      | 6.09E-05 | 3  |
| 13 | 46016101  | rs149830128 | SLC25A30-AS1 | 45992296  | 45994506  | 21595  | 6.44E-05 | 0  |
| 7  | 25272620  | rs929255    | NPVF         | 25264188  | 25268105  | 4515   | 6.74E-05 | 0  |
| 9  | 12048147  | rs115075138 | TYRP1        | 12693385  | 12710266  | 645238 | 6.90E-05 | 2  |
| 10 | 30398791  | rs2505115   | KIAA1462     | 30301728  | 30348453  | 50338  | 7.30E-05 | 26 |
| 15 | 91025830  | rs11853271  | IQGAP1       | 90931449  | 91045475  | 0      | 7.33E-05 | 0  |
| 14 | 31384628  | rs7158162   | STRN3        | 31363004  | 31495607  | 0      | 7.75E-05 | 0  |
| 15 | 63407390  | rs4774476   | LACTB        | 63413998  | 63434260  | 6608   | 7.85E-05 | 1  |

|    |           |             |            |           |           |        |          |    |
|----|-----------|-------------|------------|-----------|-----------|--------|----------|----|
| 10 | 57701140  | rs2050724   | MTRNR2L5   | 57358749  | 57360488  | 340652 | 7.92E-05 | 2  |
| 10 | 97539140  | rs10882664  | ENTPD1     | 97471535  | 97629452  | 0      | 8.42E-05 | 0  |
| 18 | 25162200  | rs1008854   | CDH2       | 25530929  | 25757410  | 368729 | 8.53E-05 | 1  |
| 11 | 13864951  | rs111514753 | RNA5SP331  | 13929030  | 13929137  | 64079  | 8.76E-05 | 1  |
| 6  | 6359328   | rs75063567  | LY86-AS1   | 6346697   | 6622977   | 0      | 8.77E-05 | 7  |
| 22 | 37381451  | rs5756452   | TEX33      | 37387165  | 37403839  | 5714   | 8.99E-05 | 2  |
| 14 | 79237349  | rs8011930   | NRXN3      | 78870092  | 80328786  | 0      | 9.22E-05 | 0  |
| 4  | 58768454  | rs10517418  | IGFBP7-AS1 | 57975927  | 58071465  | 696989 | 9.36E-05 | 0  |
| 3  | 188124354 | rs1559810   | LPP        | 187871071 | 188430630 | 0      | 9.60E-05 | 6  |
| 9  | 2179528   | rs146831108 | SMARCA2    | 2015341   | 2193624   | 0      | 9.89E-05 | 3  |
| 15 | 48433494  | rs2470102   | SLC24A5    | 48413168  | 48434869  | 0      | 0.000102 | 1  |
| 18 | 8713088   | rs593582    | SOGA2      | 8705658   | 8828944   | 0      | 0.000105 | 0  |
| 2  | 200698610 | rs17628965  | FTCDNL1    | 200625266 | 200715896 | 0      | 0.000106 | 0  |
| 3  | 165374980 | rs17706250  | BCHE       | 165490691 | 165555260 | 115711 | 0.000106 | 0  |
| 2  | 59771224  | rs2058591   | AC007179.1 | 59662347  | 59669396  | 101828 | 0.000107 | 31 |
| 13 | 38449344  | rs9548088   | TRPC4      | 38210772  | 38444562  | 4782   | 0.000107 | 1  |
| 18 | 34002578  | rs10853434  | FHOD3      | 33877676  | 34360018  | 0      | 0.000109 | 1  |
| 6  | 21016532  | rs201311    | CDKAL1     | 20534687  | 21232635  | 0      | 0.000113 | 0  |
| 13 | 70728411  | rs10507781  | ATXN8OS    | 70681344  | 70713561  | 14850  | 0.000115 | 1  |
| 7  | 21142846  | rs2893030   | AC006481.1 | 20875049  | 21062767  | 80079  | 0.000117 | 1  |

**Table S6 – Summary statistics and regulator information for known and novel pigmentation SNPs. (Related to Table 2 and Figure 5)** A) P-value, effect size and standard error, and frequency are shown for known pigmentation loci (including skin, eye, and hair color phenotypes) in the ‡Khomani, Nama, and jointly analyzed samples. B) Regulatory information including conservation, functional class, motif changes, etc, indentified via HaploReg are shown for resequencing variants in 6 of the targeted regions.

\*Provided as Excel spreadsheet due to size constraints

**Table S7 – Regions selected for targeted resequencing. (Related to Figure 5)**

Resequencing was successfully performed for a total of 441 KhoeSan individuals.

| Chromosome | Start position | Stop position | Region name                |
|------------|----------------|---------------|----------------------------|
| 1          | 213124065      | 213129065     | rs3002288_VASH2            |
| 3          | 69778586       | 70581155      | MITF_reg                   |
| 3          | 183312675      | 183402304     | KLHL24_reg                 |
| 5          | 33946089       | 33954193      | rs35395_rs16891982_SLC45A2 |
| 6          | 393821         | 398821        | rs12203592_IRF4            |
| 6          | 468636         | 473636        | rs12202284_IRF4            |
| 6          | 132705804      | 132878234     | STX7_reg                   |
| 6          | 145550394      | 145806673     | EPM2A_reg                  |
| 6          | 154719057      | 154724057     | rs6917661_OPRM1            |
| 7          | 55106677       | 55111677      | rs12668421_EGFR            |
| 9          | 1597299        | 2688571       | FLJ35024_reg               |
| 9          | 12051391       | 12710266      | TYRP1_reg                  |
| 9          | 12394231       | 12399231      | rs13289810_TYRP1           |
| 9          | 14724664       | 14910993      | FREM1_reg                  |
| 9          | 16882517       | 16887517      | rs12350739_BNC2            |
| 10         | 6087269        | 6140602       | IL2RA_reg                  |
| 10         | 8100798        | 8105798       | rs376397_GATA3             |
| 11         | 68843899       | 68848899      | rs35264875_TCPN2           |
| 11         | 89015461       | 89020461      | rs1126809_TYR              |
| 12         | 48235320       | 48346831      | VDR_gene                   |
| 12         | 89325835       | 89330835      | rs12821256_KITLG           |
| 12         | 117890817      | 118406028     | KSR2_reg                   |
| 13         | 42004631       | 43096387      | VWA8_reg                   |
| 13         | 78378646       | 78383646      | rs975739_EDNRB             |
| 14         | 52307604       | 52312604      | rs8015138_GNG2             |
| 14         | 64565582       | 64619850      | SYNE2_reg                  |
| 14         | 72388817       | 73033238      | RGS6_gene                  |
| 15         | 28000021       | 28567298      | OCA2_HERC2                 |
| 15         | 48403169       | 48434869      | SLC24A5_gene               |
| 15         | 48430994       | 48435994      | rs2470102_SLC24A5          |
| 15         | 63345526       | 63633034      | RAB8B_reg                  |
| 15         | 69186598       | 69357389      | NOX5_reg                   |
| 16         | 89983617       | 89988644      | rs1805008_rs1805007_MC1R   |
| 17         | 12328143       | 12363103      | MAP2K4_reg                 |
| 18         | 61581324       | 61780587      | CHD7_gene                  |
| 20         | 32736112       | 32741112      | rs1015362_ASIP             |

**Table S8 – Power to detect loci with suggestive and genome-wide significance for effect sizes previously associated with skin pigmentation.** A previous study by Beleza et al, 2013 showed that 4 loci explained 35% of the variation in skin color. We show power for the approximate sample sizes in phase 1, phase 2, and the resequencing analysis.

| Alpha    | % variance explained by locus | Power with N=233 | Power with N=440 | Sample size for 80% power |
|----------|-------------------------------|------------------|------------------|---------------------------|
| p = 5e-8 | 0.1                           | 0.31             | 0.91             | 376                       |
|          | 0.09                          | 0.22             | 0.84             | 420                       |
|          | 0.08                          | 0.15             | 0.73             | 475                       |
|          | 0.07                          | 0.09             | 0.58             | 546                       |
|          | 0.06                          | 0.05             | 0.41             | 640                       |
|          | 0.05                          | 0.02             | 0.24             | 772                       |
| p = 1e-5 | 0.1                           | 0.70             | 0.99             | 263                       |
|          | 0.09                          | 0.61             | 0.98             | 293                       |
|          | 0.08                          | 0.50             | 0.95             | 332                       |
|          | 0.07                          | 0.38             | 0.89             | 381                       |
|          | 0.06                          | 0.27             | 0.79             | 447                       |
|          | 0.05                          | 0.17             | 0.63             | 539                       |
